# Supplementary material for: Mechanisms and dynamics of protonation and lithiation of ferrocene
Source: Royal Society of Chemistry journal article supplement (doi:10.1039/c5cp03735b), 2015-01-01
Supplement: c5cp03735b1.pdf [file c5cp03735b1.pdf]

**Supporting information for:**

**Mechanisms and Dynamics of Protonation and**

**Lithiation of Ferrocene**

Nishant Sharma, Jayanth K. Ajay, Krishnan Venkatasubbaiah, and Upakarasamy  
Lourderaj\*

*School of Chemical Sciences, National Institute of Science Education and Research,  
Bhubaneswar, Odisha, INDIA*

E-mail: u.lourderaj@niser.ac.in

---

\*To whom correspondence should be addressed

## Computational Details

The potential energy profiles for protonated and lithiated ferrocene were mapped using B3LYP<sup>S1,S2</sup> and BPW91<sup>S3,S4</sup> functionals and DZVP<sup>S5,S6</sup> basis set. The stationary point structures were characterized by computing harmonic vibrational frequencies. GAUSSIAN 09<sup>S7</sup> and NWChem<sup>S8</sup> software were used to carry out these calculations. The protonation and lithiation energies were found to be 211.06 and 41.52 kcal/mol respectively. All the energies reported here are without zero-point-energy correction. At BPW91/DZVP level, **MP** and **AG** were found to be nearly degenerate. B3LYP/DZVP results were closer to CCSD(T)/pVDZ<sup>S9</sup> ones and hence the ab initio trajectories were calculated using this level of theory.

Ab initio classical trajectories<sup>S10,S11</sup> were performed to understand the unimolecular as well as the bimolecular dynamics of protonation and lithiation of ferrocene using VENUS/NWChem,<sup>S12</sup> where the ab initio forces were computed at B3LYP/DZVP level of theory. The initial coordinates and momenta were selected using quasi-classical sampling procedure.<sup>S13</sup> The trajectories were integrated numerically using velocity-Verlet algorithm,<sup>S14</sup> using a time step of 0.5 fs in protonation reaction, and 0.5 fs and 0.3 fs for unimolecular and bimolecular dynamics in lithiation reaction. The trajectories were numerically integrated for 0.5-1 ps. The typical CPU time for  $\sim 1$  ps integration of a trajectory on a 8 core Intel Xeon (3.0 GHz) processor is  $\sim 6$  days.

In unimolecular dynamics study of protonated ferrocene, the trajectories were initiated from **MP** and **AG** minima, and the initial coordinates and momenta were chosen using a Boltzmann distribution of vibrational and rotational energies at 300 K. For bimolecular collision dynamics, the trajectories were initiated with ferrocene and  $H^+$  separated by 8 Å and with Boltzmann distribution of vibrational and rotational energies for ferrocene at 300 K. However, these trajectories failed due to SCF convergence issues at large separation between ferrocene and  $H^+$  during initialization. To overcome the problem and mimic bimolecular collisions, trajectories were initiated using three partially optimized structures (Fig. S4) obtained by fixing (i) the endo C-H distance at 5 Å in **AG**, (ii)  $H^+$  on top of the Cp ring with  $\angle X_1\text{-Fe-H} = 4.6^\circ$  and Fe-H at 6.6 Å (iii)  $\angle X_1\text{-Fe-H}$  at  $41.8^\circ$  and Fe-H at 7.48 Å. The three optimized structures had one imaginary frequency and are 105.4,

97.9, and 98.0 kcal/mol above **AG** in energy. A Boltzmann distribution of energies is assumed at these structures. A total of 182 trajectories were initiated with different orientations of  $H^+$  about ferrocene with Boltzmann distribution of vibrational and rotational energies at 300 K. Of the 182 trajectories, 80 resulted in the protonation of ferrocene. In the remaining 102 trajectories,  $H^+$  moved away from ferrocene, and these trajectories were terminated after 200 fs.

The unimolecular dynamics study of lithiated ferrocene was performed by following trajectories initiated at **TSe** and **TSf**. For bimolecular collision reaction, trajectories were initiated with ferrocene and  $Li^+$  separated by 8 Å and relative kinetic energy of 0.89 kcal/mol corresponding to 300 K. The impact parameter ( $b$ ) was taken to be zero for effective collisions. 80 trajectories were integrated, and all of them resulted in lithiation of ferrocene. Additional trajectories were calculated for  $b = 2$  and  $b = 5$  Å (8 each), and all of them were reactive.

**Table S1: Comparison of structural parameters and relative energies of ferrocene and its protonated forms.**

|                                       | MP                 |                    |                    | AG                 |                    |                    | Ferrocene          |                    |                    |
|---------------------------------------|--------------------|--------------------|--------------------|--------------------|--------------------|--------------------|--------------------|--------------------|--------------------|
|                                       | BPW91 <sup>a</sup> | B3LYP <sup>a</sup> | B3LYP <sup>b</sup> | BPW91 <sup>a</sup> | B3LYP <sup>a</sup> | B3LYP <sup>b</sup> | BPW91 <sup>a</sup> | B3LYP <sup>a</sup> | B3LYP <sup>b</sup> |
| Fe-H <sup>+</sup> (Å)                 | 1.50               | 1.48               | 1.49               | 1.58               | 1.67               | 1.70               | -                  | -                  | -                  |
| C-H <sup>+</sup> (Å)                  | 1.87               | 1.87               | 1.88               | 1.36               | 1.23               | 1.22               | -                  | -                  | -                  |
| Fe-X <sub>1</sub> (Å) <sup>c</sup>    | 1.68               | 1.71               | 1.70               | 1.67               | 1.71               | 1.70               | 1.64               | 1.68               | 1.67               |
| Fe-X <sub>2</sub> (Å) <sup>d</sup>    | 1.68               | 1.71               | 1.70               | 1.68               | 1.70               | 1.69               | 1.64               | 1.68               | 1.67               |
| X <sub>1</sub> -Fe-X <sub>2</sub> (°) | 167                | 167                | 167                | 169                | 169                | 169                | 180                | 180                | 180                |
| X <sub>1</sub> -Fe-H <sup>+</sup> (°) | 97                 | 97                 | 97                 | 80                 | 74                 | 74                 | -                  | -                  | -                  |
| C-H (Å)                               | -                  | -                  | -                  | -                  | -                  | -                  | 1.09               | 1.08               | 1.08               |
| Fe-C (Å)                              | -                  | -                  | -                  | -                  | -                  | -                  | 2.05               | 2.08               | 2.07               |
| Structure                             | eclipsed           |
| $\Delta E$ <sup>e</sup> (kcal/mol)    | -0.03              | 2.60               | 2.58               | 0                  | 0                  | 0                  | -                  | -                  | -                  |

<sup>a</sup>6-311++G\*\* basis set. <sup>b</sup>DZVP basis set. <sup>c</sup>X<sub>1</sub> is the center of the Cp ring which is closer to the H<sup>+</sup>. <sup>d</sup>X<sub>2</sub> is the center of the Cp ring which is farther from the H<sup>+</sup>. <sup>e</sup> $\Delta E = E_{MP} - E_{AG}$  at different levels of theory.

**Table S2: Comparison of structural parameters and relative energies of three different transition states.**

|                                       | TSb                |                    |                    | TSa                |                    |                    | TSd                |                    |                    | TSc <sup>c</sup>   |                    |
|---------------------------------------|--------------------|--------------------|--------------------|--------------------|--------------------|--------------------|--------------------|--------------------|--------------------|--------------------|--------------------|
|                                       | BPW91 <sup>a</sup> | B3LYP <sup>a</sup> | B3LYP <sup>b</sup> | BPW91 <sup>a</sup> | B3LYP <sup>a</sup> | B3LYP <sup>b</sup> | BPW91 <sup>a</sup> | B3LYP <sup>a</sup> | B3LYP <sup>b</sup> | B3LYP <sup>a</sup> | B3LYP <sup>b</sup> |
| Im. Freq (cm <sup>-1</sup> )          | 44i                | 29i                | 30i                | 290i               | 144i               | 308i               | 653i               | 742i               | 848i               | 48i                | 48i                |
| Fe-H <sup>+</sup> (Å)                 | 1.59               | 1.68               | 1.71               | 1.52               | 1.48               | 1.50               | -                  | -                  | -                  | 1.48               | 1.48               |
| C-H <sup>+</sup> (Å)                  | 1.34               | 1.22               | 1.21               | 1.57               | 1.80               | 1.70               | 1.29               | 1.28               | 1.29               | 1.91               | 1.91               |
| Fe-X <sub>1</sub> (Å) <sup>d</sup>    | 1.67               | 1.71               | 1.70               | 1.67               | 1.70               | 1.69               | 1.59               | 1.64               | 1.62               | 1.71               | 1.71               |
| Fe-X <sub>2</sub> (Å) <sup>e</sup>    | 1.68               | 1.71               | 1.69               | 1.68               | 1.71               | 1.70               | 1.67               | 1.70               | 1.68               | 1.70               | 1.70               |
| X <sub>1</sub> -Fe-X <sub>2</sub> (°) | 168                | 169                | 169                | 168                | 167                | 167                | 178                | 178                | 178                | 159                | 159                |
| X <sub>1</sub> -Fe-H <sup>+</sup> (°) | 79                 | 74                 | 74                 | 87                 | 94                 | 91                 | 25                 | 25                 | 25                 | 98                 | 98                 |
| Structure                             | staggered          | staggered          | staggered          | eclipsed           | staggered          |
| $\Delta E$ <sup>f</sup> (kcal/mol)    | 0.85               | 0.37               | 0.31               | 0.13               | 2.60               | 2.63               | 20.1               | 20.09              | 20.29              | 20.29              | 5.16               |

<sup>a</sup>6-311++G\*\* basis set. <sup>b</sup>DZVP basis set. <sup>c</sup>TSc could not be located for B3LYP/6-311++g\*\* and BPW91/6-311++g\*\* levels of theory. <sup>d</sup>X<sub>1</sub> is the center of the Cp ring which is closer to the H<sup>+</sup>. <sup>e</sup>X<sub>2</sub> is the center of the Cp ring which is farther from the H<sup>+</sup>. <sup>f</sup>Energies relative to AG at different levels of theory.

**Table S3: Comparison of structural parameters and relative energies of lithiated ferrocene using B3LYP/DZVP level of theory.**

|                                    | CP       | TSe      | ML       | TSf      |
|------------------------------------|----------|----------|----------|----------|
| Fe-Li(Å)                           | 3.60     | 3.53     | 2.46     | 2.53     |
| C-Li(Å)                            | 2.32     | 2.23     | 2.49     | 2.34     |
| Li-H(Å)                            | 3.06     | 1.97     | 2.49     | 2.19     |
| Fe-X <sub>1</sub> (Å) <sup>a</sup> | 1.64     | 1.68     | 1.69     | 1.70     |
| Fe-X <sub>2</sub> (Å) <sup>b</sup> | 1.68     | 1.67     | 1.69     | 1.70     |
| C-X <sub>1</sub> -Fe-Li(°)         | -        | -        | 44.15    | 4.01     |
| X <sub>1</sub> -Fe-Li(°)           | 0.06     | 61.33    | 94       | 95.23    |
| Structure                          | eclipsed | eclipsed | eclipsed | eclipsed |
| $\Delta E^c$ (kcal/mol)            | 0        | 23.62    | 7.05     | 8.52     |

<sup>a</sup>X<sub>1</sub> is the center of the Cp ring which is closer to the Li<sup>+</sup>. <sup>b</sup>X<sub>2</sub> is the center of the Cp ring which is farther from the Li<sup>+</sup>. <sup>c</sup>Energies are given relative to CP.

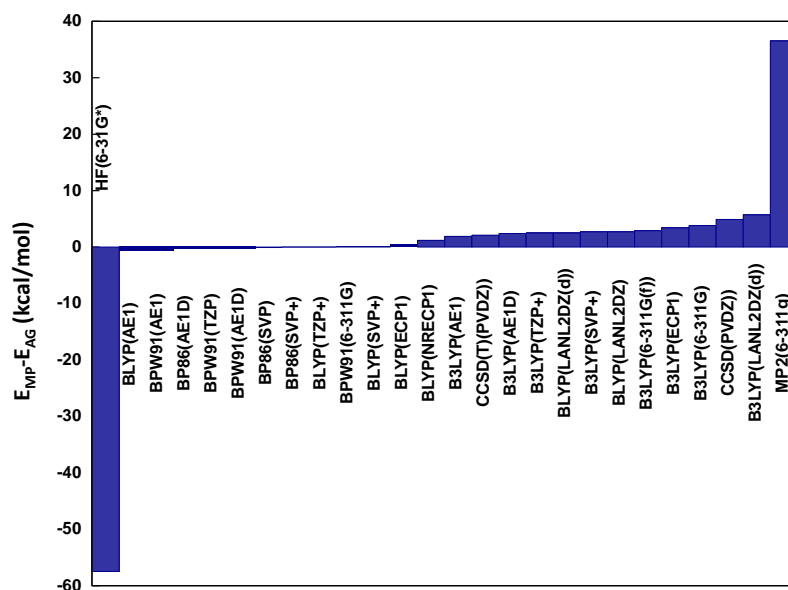

**Fig. S1: Comparison of energy differences between metal-protonated (MP) and agostic (AG) structures in different levels of theory.**

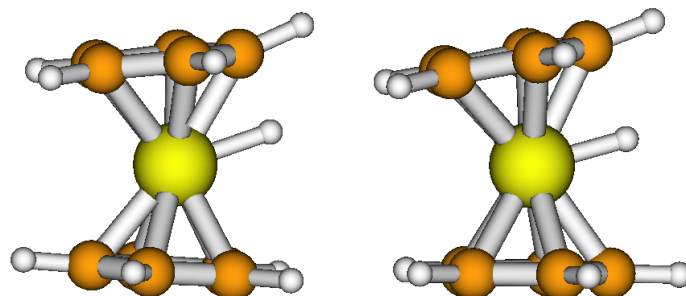

**TSb**

**TSa**

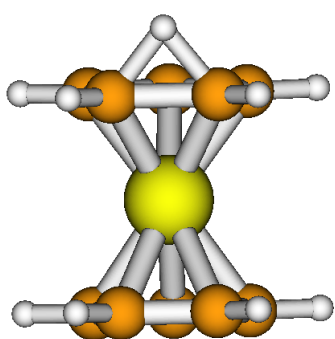

**TSd**

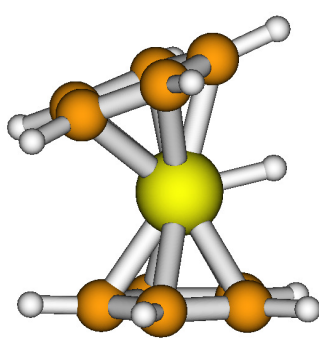

**TSd**

(a)

**AG**

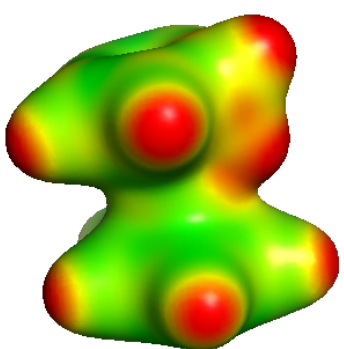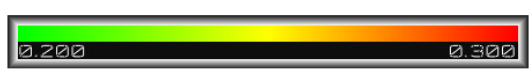

**MP**

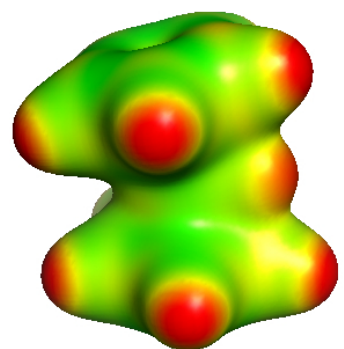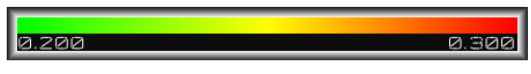

(b)

Fig. S2: (a) Structures of **TSb**, **TSa**, **TSd** and **TSd** of protonated ferrocene. (b) MEP (in a.u.) map for **AG** and **MP** of protonated ferrocene

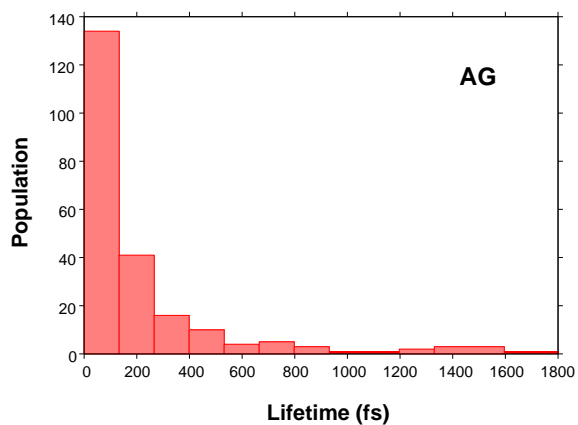

(a)

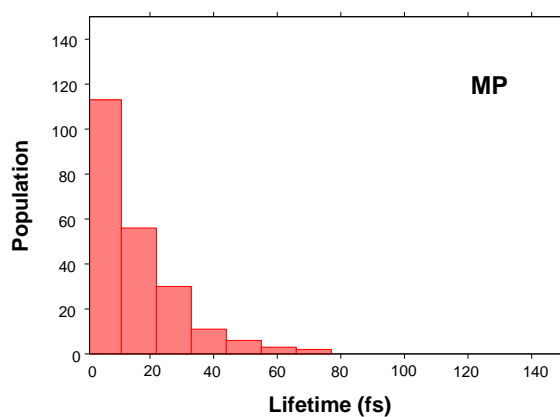

(b)

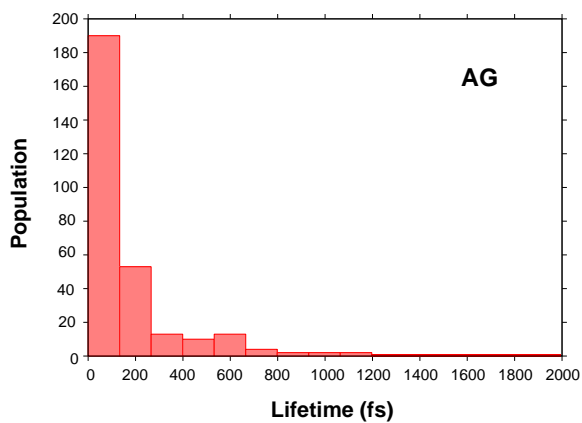

(c)

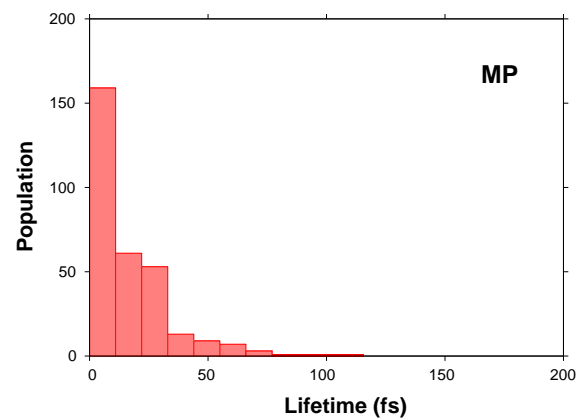

(d)

Fig. S3: Plot of population vs lifetime for agostic and metal-protonated forms when the trajectories were initiated from **AG** (a and b) and **MP** (c and d) minima respectively.

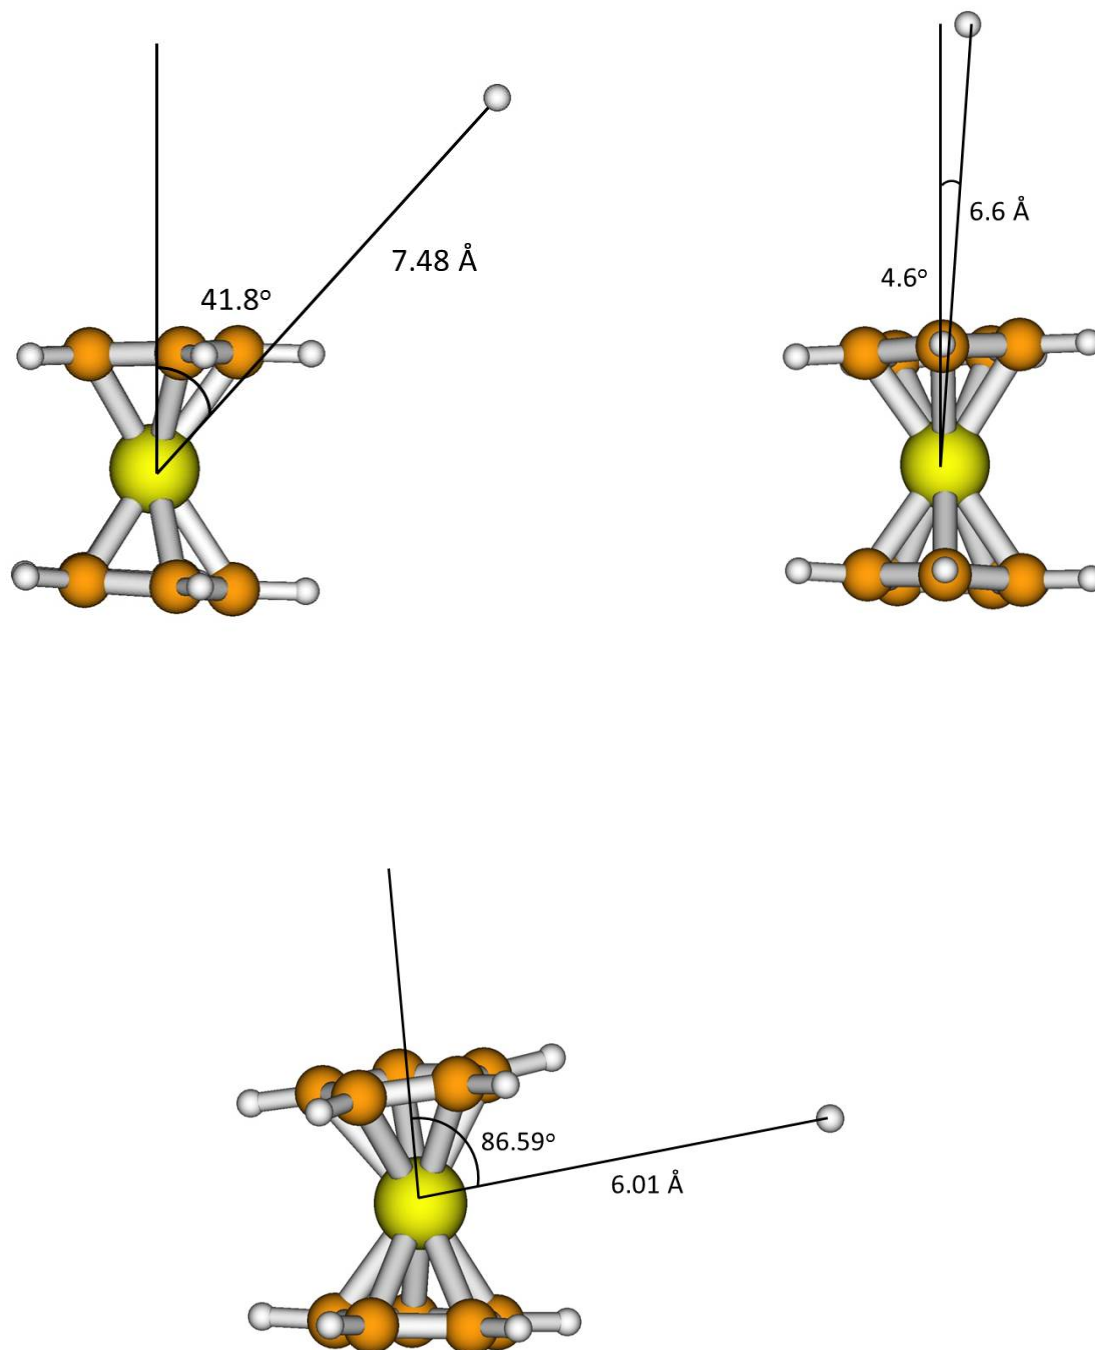

Fig. S4: Geometries used to sample trajectories for protonation of ferrocene to represent bimolecular collision.



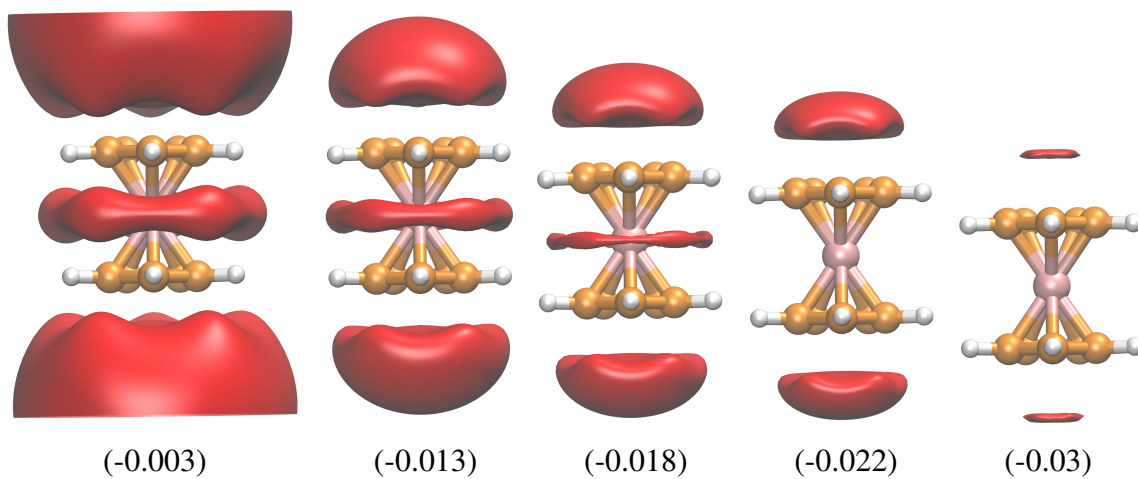

Fig. S5: Electrostatic potential (in a.u.) map of ferrocene for different iso-values.

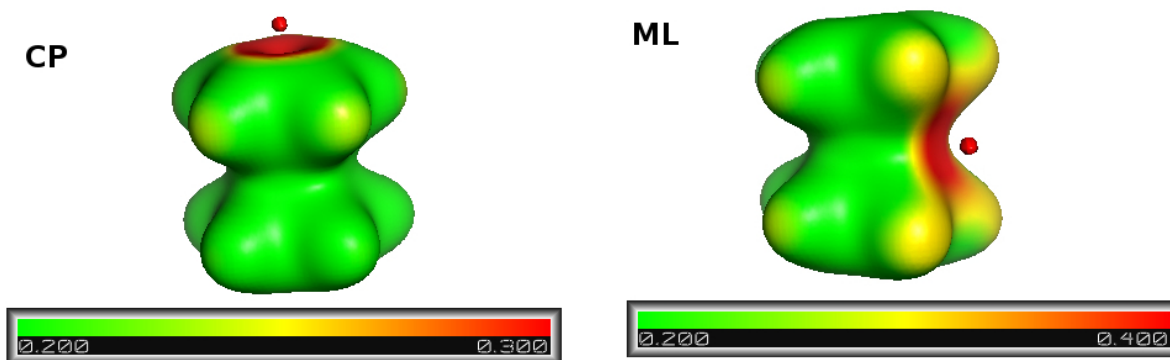

Fig. S6: MEP (in a.u.) map for **CP** and **ML** of lithiated ferrocene.

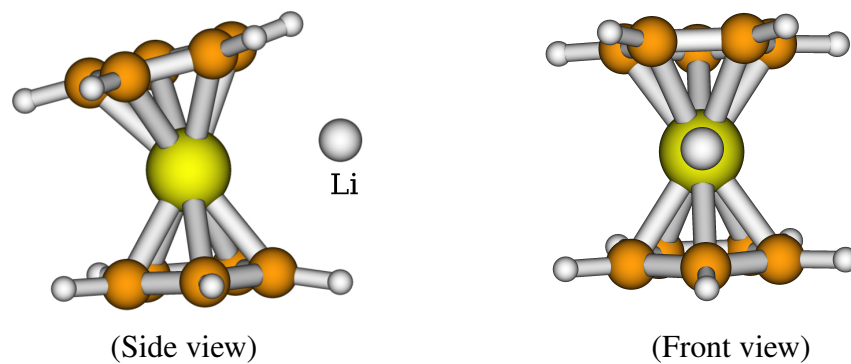

Fig. S7: Structures of **TSg** connecting two **ML** minima.

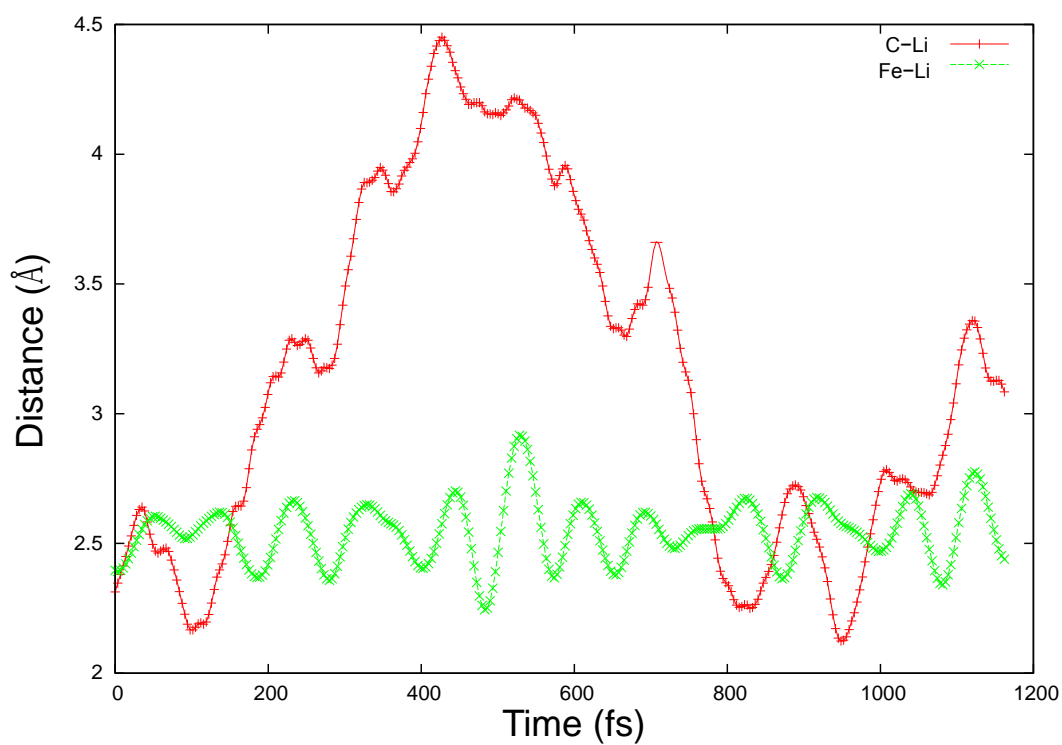

Fig. S8: Fe-Li and C-Li distance as a function of time for a representative trajectory that shows planetary motion.

## References

- (S1) Lee, C.; Yang, W.; Parr, R. G. *Phys. Rev. B* **1988**, *37*, 785.
- (S2) Becke, A. D. *J. Phys. Chem.* **1993**, *98*, 5648.
- (S3) Becke, A. D. *Phys. Rev. A* **1988**, *38*, 3098.
- (S4) Perdew, J. P. and Wang, Y. *Phys. Rev. B* **1992**, *45*, 13244..
- (S5) Godbout, N.; Salahub, D. R.; Andzelm, J.; Wimmer, E. *Can. J. Chem.* **1992**, *70*, 560.
- (S6) Sosa, C.; Andzelm, J.; Elkin, B. C.; Wimmer, E.; Dobbs, K. D.; Dixon, D. A. *J. Phys. Chem.* **1992**, *96*, 6630.
- (S7) Frisch, M. J. et al. Gaussian-09 Revision C.01. Gaussian Inc. Wallingford CT 2009.
- (S8) Valiev, M.; Bylaska, E.; Govind, N.; Kowalski, K.; Straatsma, T.; Dam, H. V.; Wang, D.; Nieplocha, J.; Apra, E.; Windus, T.; de Jong, W. *Comput. Phys. Commun.* **2010**, *181*, 1477.
- (S9) Mayor-López, M. J.; Lüthi, H. P.; Koch, H.; Morgantini, P. Y.; Weber, J. *J. Chem. Phys.* **2000**, *113*, 8009.
- (S10) Sun, L.; Hase, W. L. *Reviews in Computational Chemistry*; John Wiley & Sons, Inc., 2003; pp 79–146.
- (S11) Lourderaj, U.; Song, K.; Windus, T. L.; Zhuang, Y.; Hase, W. L. *J. Chem. Phys.* **2007**, *126*.
- (S12) Lourderaj, U.; Sun, R.; Kohale, S. C.; Barnes, G. L.; de Jong, W. A.; Windus, T. L.; Hase, W. L. *Comput. Phys. Commun.* **2014**, *185*, 1074.
- (S13) Peslherbe, G. H.; Wang, H.; Hase, W. L. *Advances in Chemical Physics*; John Wiley & Sons, Inc., 2007; pp 171–201.
- (S14) Levesque, D.; Verlet, L. *J. Stat. Phys.* **1993**, *72*, 519.
